# Supplementary material for: Impact of size and UV-ageing of polystyrene nanoparticles on copper(ii) adsorption: kinetics and isotherms in aquatic environments
Source: Royal Society of Chemistry journal article supplement (doi:10.1039/d4en00433g), 2024-09-24
Supplement: d4en00433g1.pdf [file d4en00433g1.pdf]

# Supplementary Document for Impact of Size and UV-ageing of Polystyrene Nanoparticles on Copper(II) Adsorption: Kinetics and Isotherms in Aquatic Environments

Shadab Soheilian<sup>a</sup>, Beth Jordan<sup>a</sup>, Fiona Hatton<sup>a</sup>, Eugenie Hunsicker<sup>b</sup>, and Zhaoxia Zhou<sup>a</sup>

<sup>a</sup>Department of Materials, Loughborough University, Loughborough, UK

<sup>b</sup>Department of Mathematical Sciences, Loughborough University, Loughborough, UK

**Table S1** Concentrations of chemical components of artificial seawater.

| Components                           | Conc. (g/L) |
|--------------------------------------|-------------|
| NaCl                                 | 24.54       |
| MgCl <sub>2</sub> ·6H <sub>2</sub> O | 11.11       |
| Na <sub>2</sub> SO <sub>4</sub>      | 4.09        |
| CaCl <sub>2</sub>                    | 1.53        |
| KCl                                  | 0.69        |
| NaHCO <sub>3</sub>                   | 0.20        |
| KBr                                  | 0.10        |
| SrCl <sub>2</sub>                    | 0.04        |
| H <sub>3</sub> BO <sub>3</sub>       | 0.027       |
| NaF                                  | 0.003       |

**Table S2** Molarity of each ions for components of artificial seawater.

| Components                    | Molarity (M) |
|-------------------------------|--------------|
| Na <sup>+</sup>               | 0.4799       |
| Cl <sup>-</sup>               | 0.6908       |
| Mg <sup>2+</sup>              | 0.1167       |
| SO <sub>4</sub> <sup>2-</sup> | 0.0288       |
| Ca <sup>2+</sup>              | 0.0138       |
| K <sup>+</sup>                | 0.0101       |
| HCO <sub>3</sub> <sup>-</sup> | 0.00238      |
| BO <sub>3</sub> <sup>3-</sup> | 0.00043      |
| Br <sup>-</sup>               | 0.00084      |
| Sr <sup>2+</sup>              | 0.000252     |
| F <sup>-</sup>                | 0.000071     |

### Equations used for Calculation of Conversion Rate for Synthesized PS-NPs:

$$\text{Conversion rate}(\%) = \left( \frac{\text{Measured solid content}(\%)}{\text{Theoretical solid content}(\%)} \right) \times 100 \quad (\text{S1})$$

where theoretical solid content can be expressed as below:

$$\text{Theoretical solid}(\%) \text{ at } 100\% \text{ monomer conversion} = \left( \frac{\text{Total mass of reagents}(g)}{\text{Total mass of reagents and solvent}(g)} \right) \times 100 \quad (\text{S2})$$

**Linear forms of Adsorption Isotherm Models:** Linear form of Langmuir model can be expressed as:

$$\frac{C_e}{q_e} = \frac{C_e}{q_m} + \frac{1}{K_l q_m} \quad (\text{S3})$$

where  $q_m$  and  $K_l$  can be calculated from the slope,  $1/q_m$ , and the intercept,  $1/K_l q_m$ , of the fitted line.

Linear form of Freundlich model can be written as below:

$$\log q_e = \log K_f + \frac{1}{n} \log C_e \quad (\text{S4})$$

where  $n$  and  $K_f$  can be determined from the slop,  $1/n$ , and the intercept,  $\log K_f$ .

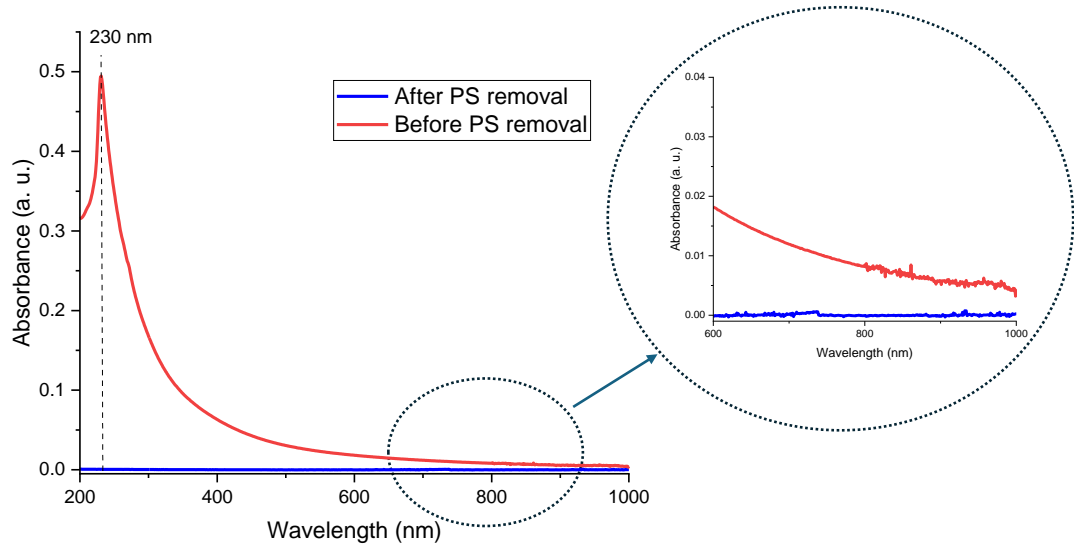

**Fig. S1** UV-Vis spectra before and after removal of PS-NPs from the suspension using centrifugation.

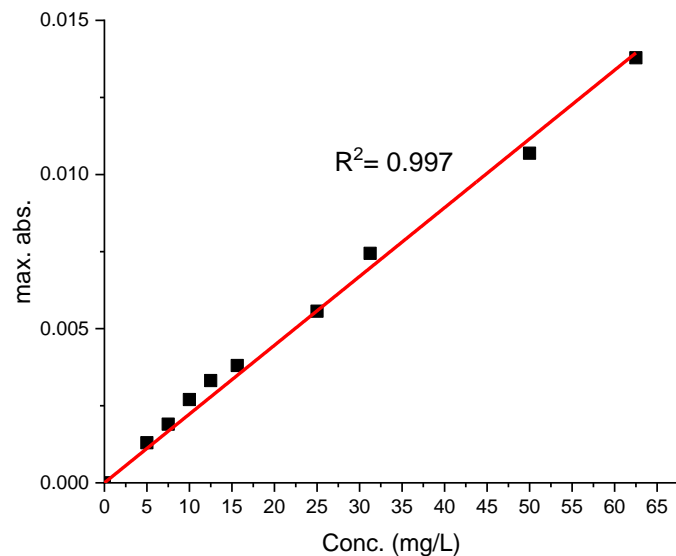

**Fig. S2** UV-Vis calibration curve for known concentrations of  $Cu^{2+}$  ions with maximum absorbance at  $\lambda=800\text{nm}$ .

**Calculation of the adsorbed mass of  $Cu^{2+}$  ions,  $q_t$  (mg/g), by PS-NPs:**

$$q_t = \frac{C_0 - C_t}{m} \times V \quad (S5)$$

where  $C_0$  and  $C_t$  are initial and time  $t$  metal ion concentrations (mg/L), respectively.  $V$  is the volume of the solution in litre (L) and  $m$  is the mass of the adsorbent, PS-NPs, in grams (g).

**Table S3** The value of reactants in synthesizing different PS particle sizes.

| Entry No. | Methanol (g) | Water(g) | Styrene(g) | KPS(g) | Average diameter(nm) | Polydispersity Index | Conversion Rate(%) |
|-----------|--------------|----------|------------|--------|----------------------|----------------------|--------------------|
| 1         | 28           | 2        | 1          | 0.0075 | 760                  | 0.122                | 96                 |
| 2         | 28           | 2        | 1          | 0.007  | 520                  | 0.044                | 96                 |
| 3         | 27           | 3        | 1          | 0.0075 | 597                  | 0.134                | 90                 |
| 4         | 21           | 9        | 1          | 0.007  | 360                  | 0.002                | 95                 |
| 5         | 20           | 10       | 1          | 0.007  | 320                  | 0.006                | 94                 |
| 6         | 16           | 14       | 1          | 0.007  | 260                  | 0.009                | 96                 |
| 7         | 10           | 20       | 1          | 0.0074 | 370                  | 0.004                | 95                 |
| 8         | 10           | 20       | 1          | 0.002  | 267                  | 0.002                | 96                 |
| 9         | 10           | 20.5     | 0.5        | 0.002  | 130                  | 0.003                | 94                 |
| 10        | 4            | 26.5     | 0.5        | 0.002  | 120                  | 0.157                | 74                 |

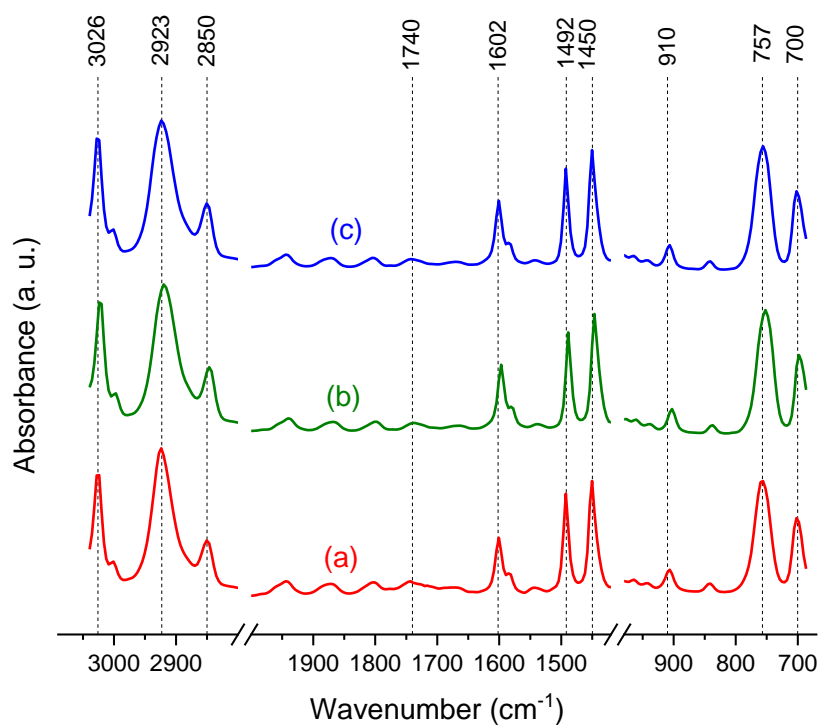

**Fig. S3** FTIR spectra of (a) PS-130, (b) PS-260 and (c) PS-520.

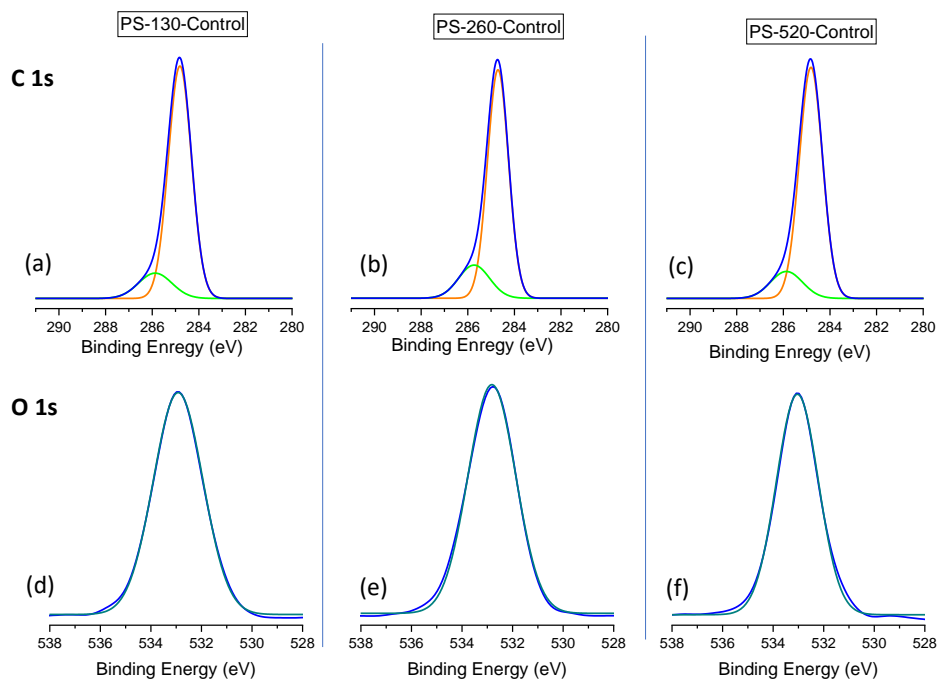

**Fig. S4** (a-c) C 1s and (d-f) O 1s XPS spectra of PS control samples.

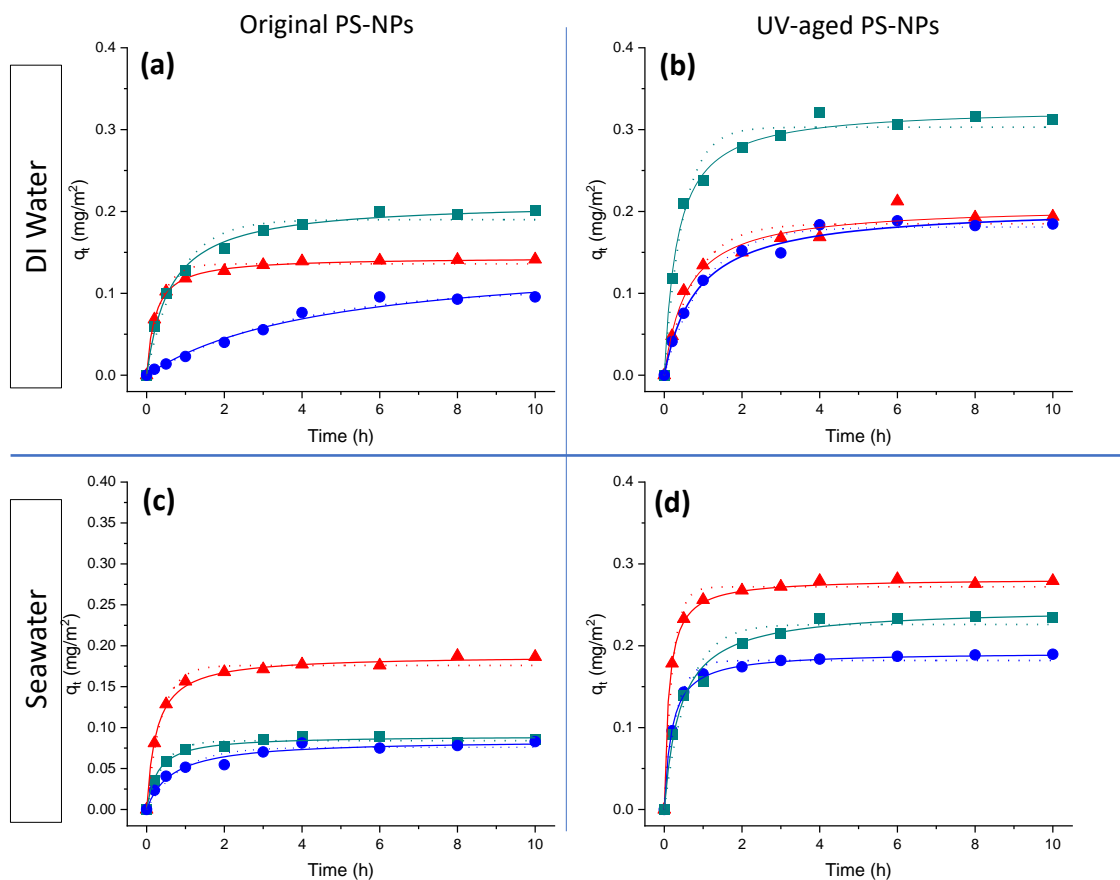

**Fig. S5** Adsorption kinetics of  $\text{Cu}^{2+}$ , where  $q_t$  was calculated based on specific surface area of PS-130 ( $\blacktriangle$ ), PS-260 ( $\blacksquare$ ), and PS-520 ( $\bullet$ ) in (a,b) DI water and (c,d) seawater, with PFO (dotted line) and PSO (solid line) model fittings.

**Table S4** Fitting parameters of adsorption kinetics of  $\text{Cu}^{2+}$ , where  $q_t$  normalised by the corresponding surface area of the PS-NPs in each condition.

|             | Medium   | Size (nm) | $q_{e,exp_{SSA}}$ (mg/m <sup>2</sup> ) | PFO                                     |       | PSO     |                                         |        |         |
|-------------|----------|-----------|----------------------------------------|-----------------------------------------|-------|---------|-----------------------------------------|--------|---------|
|             |          |           |                                        | $q_{e1,Cal_{SSA}}$ (mg/m <sup>2</sup> ) | $K_1$ | $R_1^2$ | $q_{e2,Cal_{SSA}}$ (mg/m <sup>2</sup> ) | $K_2$  | $R_2^2$ |
| Original PS | DI water | 130       | 0.141                                  | 0.136                                   | 2.947 | 0.982   | 0.144                                   | 31.526 | 0.999   |
|             |          | 260       | 0.199                                  | 0.190                                   | 1.232 | 0.971   | 0.212                                   | 7.858  | 0.995   |
|             |          | 520       | 0.095                                  | 0.106                                   | 0.273 | 0.985   | 0.148                                   | 1.465  | 0.979   |
|             | Seawater | 130       | 0.186                                  | 0.176                                   | 2.674 | 0.986   | 0.188                                   | 21.391 | 0.997   |
|             |          | 260       | 0.087                                  | 0.084                                   | 2.401 | 0.984   | 0.090                                   | 40.362 | 0.985   |
|             |          | 520       | 0.080                                  | 0.076                                   | 1.156 | 0.938   | 0.085                                   | 18.332 | 0.970   |
| UV-aged PS  | DI water | 130       | 0.195                                  | 0.185                                   | 1.302 | 0.952   | 0.207                                   | 8.187  | 0.977   |
|             |          | 260       | 0.314                                  | 0.303                                   | 2.097 | 0.978   | 0.327                                   | 9.261  | 0.994   |
|             |          | 520       | 0.184                                  | 0.181                                   | 0.974 | 0.982   | 0.206                                   | 5.823  | 0.988   |
|             | Seawater | 130       | 0.280                                  | 0.272                                   | 4.800 | 0.990   | 0.283                                   | 30.725 | 0.999   |
|             |          | 260       | 0.234                                  | 0.226                                   | 3.300 | 0.960   | 0.246                                   | 27.463 | 0.989   |
|             |          | 520       | 0.190                                  | 0.182                                   | 1.672 | 0.989   | 0.192                                   | 9.956  | 0.999   |

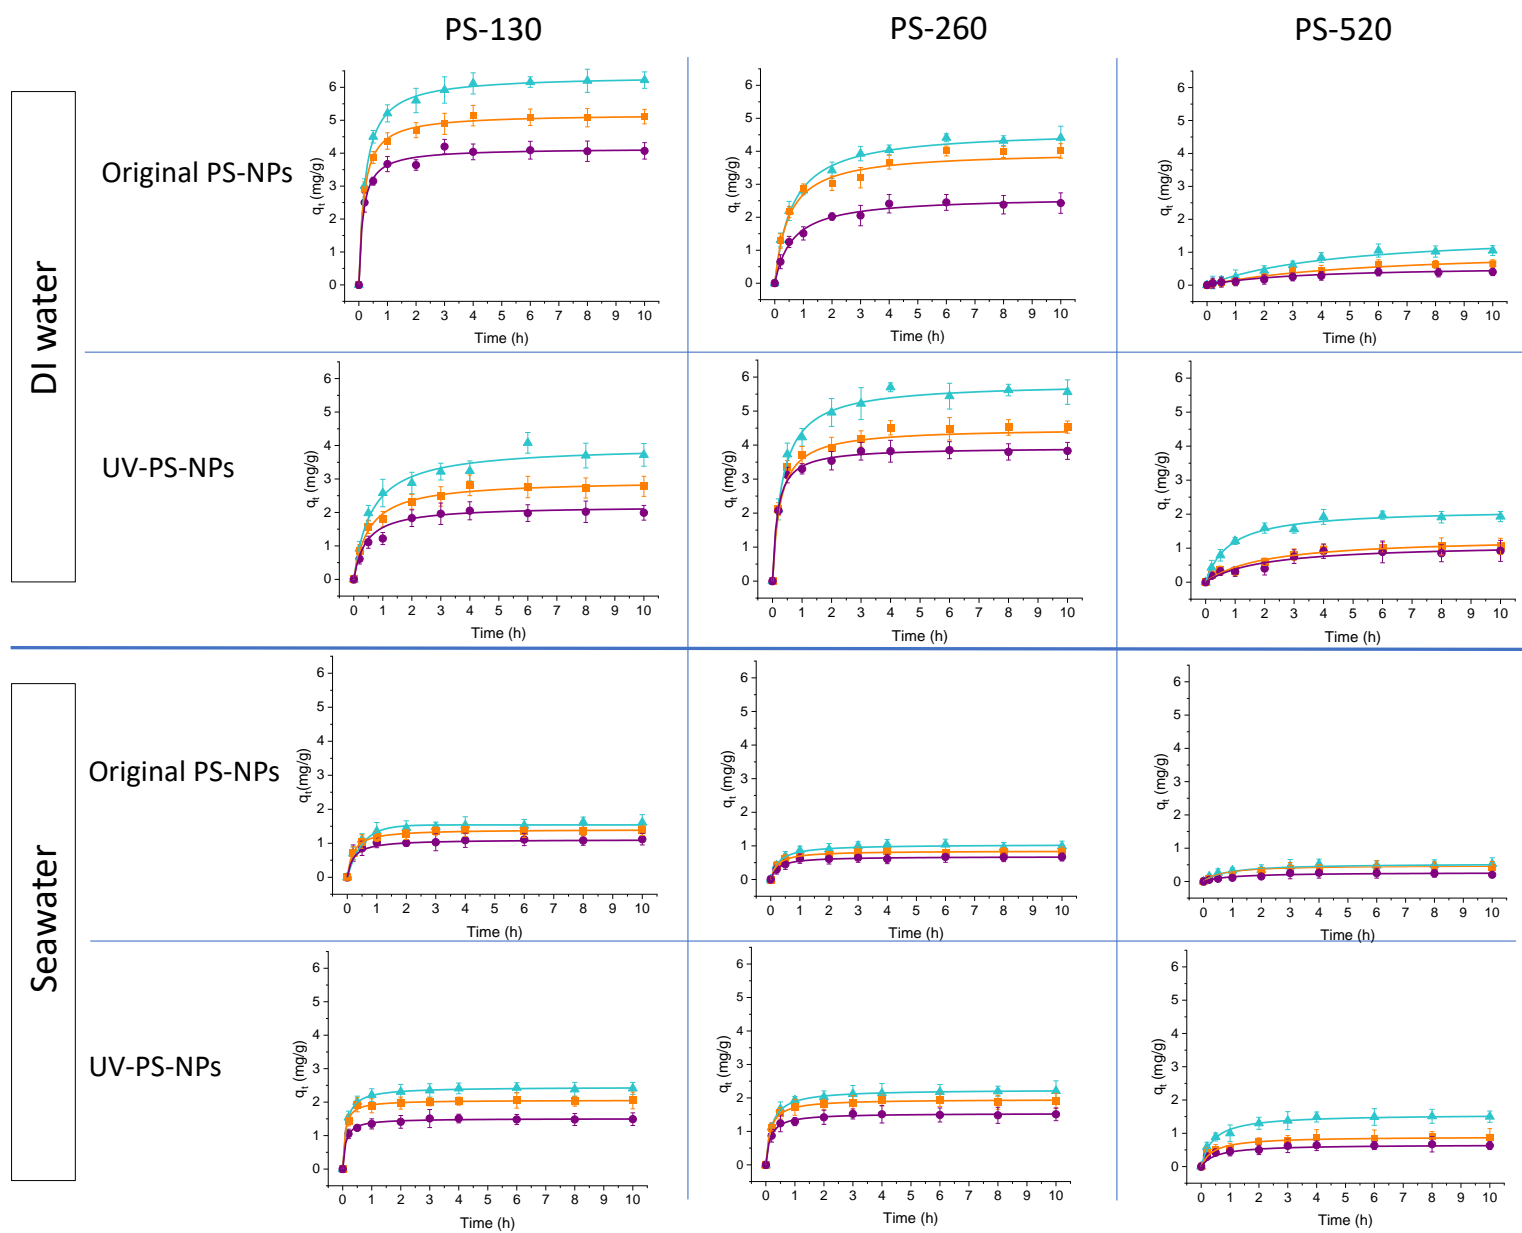

**Fig. S6** The kinetics of  $Cu^{2+}$  adsorption by original and UV-aged PS-NPs in DI water and seawater at different temperatures (290 K ▲, 300 K ■, 310 K ●) including their PSO model fittings.

**Table S5** Pseudo-second order (PSO) fitting parameters of adsorption kinetics of  $\text{Cu}^{2+}$  ions at different temperatures.

|             | Particle size(nm) | 290 K       |              |       |         | 300 K       |              |       |         | 310 K       |              |       |         |       |
|-------------|-------------------|-------------|--------------|-------|---------|-------------|--------------|-------|---------|-------------|--------------|-------|---------|-------|
|             |                   | $q_{e,exp}$ | $q_{e2,Cal}$ | $K_2$ | $R_2^2$ | $q_{e,exp}$ | $q_{e2,Cal}$ | $K_2$ | $R_2^2$ | $q_{e,exp}$ | $q_{e2,Cal}$ | $K_2$ | $R_2^2$ |       |
| Original PS | DI water          | 130         | 6.20         | 6.36  | 0.717   | 0.999       | 5.12         | 5.19  | 1.154   | 0.998       | 4.07         | 4.15  | 1.702   | 0.991 |
|             |                   | 260         | 4.41         | 4.67  | 0.357   | 0.995       | 4.01         | 4.11  | 0.499   | 0.982       | 2.44         | 2.62  | 0.639   | 0.990 |
|             |                   | 520         | 1.05         | 1.63  | 0.133   | 0.979       | 0.70         | 1.10  | 0.154   | 0.977       | 0.44         | 0.58  | 0.231   | 0.973 |
|             | Seawater          | 130         | 1.54         | 1.63  | 2.474   | 0.996       | 1.37         | 1.41  | 3.745   | 0.997       | 1.10         | 1.11  | 4.403   | 0.993 |
|             |                   | 260         | 1.02         | 1.05  | 3.458   | 0.986       | 0.82         | 0.85  | 4.298   | 0.989       | 0.66         | 0.68  | 5.002   | 0.984 |
|             |                   | 520         | 0.50         | 0.54  | 2.312   | 0.972       | 0.41         | 0.48  | 3.312   | 0.971       | 0.25         | 0.27  | 3.938   | 0.910 |
| UV-aged PS  | DI water          | 130         | 3.83         | 3.99  | 0.418   | 0.977       | 2.76         | 2.96  | 0.661   | 0.990       | 2.01         | 2.19  | 1.104   | 0.981 |
|             |                   | 260         | 5.58         | 5.83  | 0.522   | 0.994       | 4.52         | 4.50  | 0.877   | 0.940       | 3.84         | 3.93  | 1.541   | 0.995 |
|             |                   | 520         | 1.93         | 2.15  | 0.279   | 0.991       | 1.05         | 1.31  | 0.387   | 0.966       | 0.90         | 1.13  | 0.452   | 0.925 |
|             | Seawater          | 130         | 2.42         | 2.45  | 3.542   | 0.999       | 2.05         | 2.06  | 6.471   | 0.995       | 1.49         | 1.51  | 6.951   | 0.996 |
|             |                   | 260         | 2.19         | 2.25  | 2.347   | 0.999       | 1.93         | 1.96  | 3.504   | 0.997       | 1.51         | 1.54  | 4.447   | 0.995 |
|             |                   | 520         | 1.49         | 1.57  | 1.560   | 0.989       | 0.88         | 0.90  | 2.393   | 0.966       | 0.64         | 0.66  | 2.646   | 0.969 |

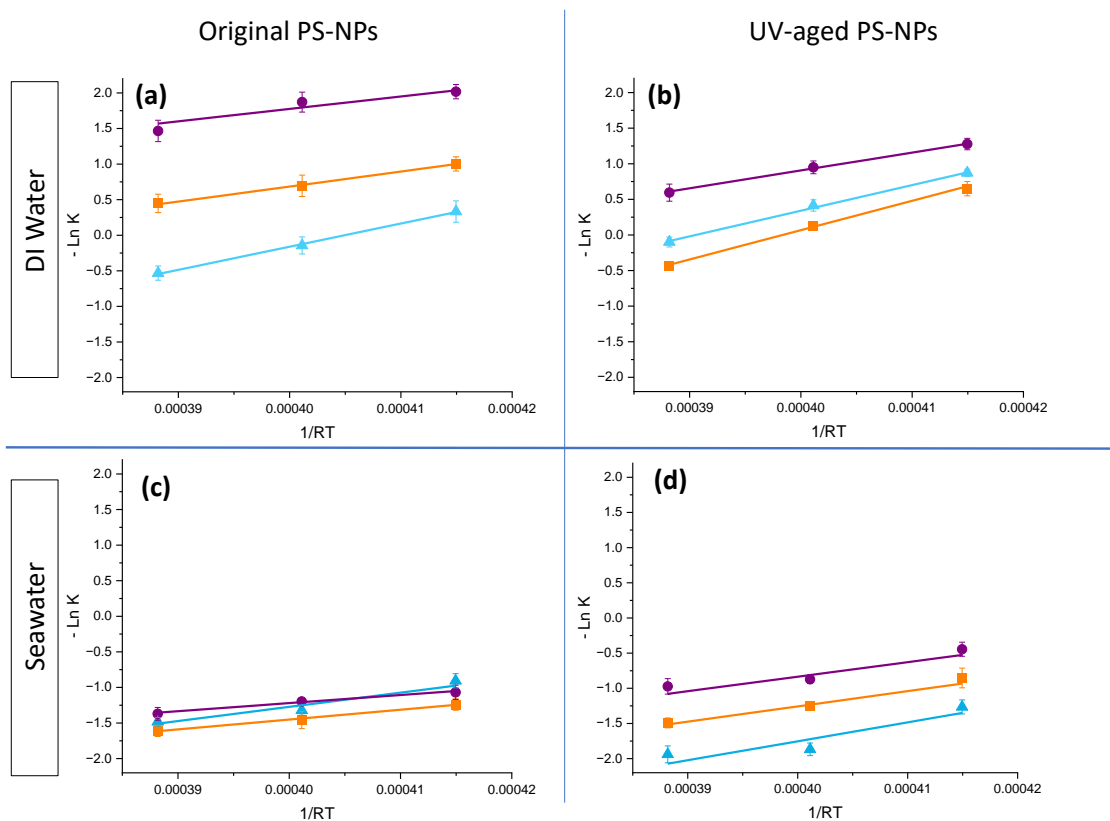

**Fig. S7** Arrhenius plots of  $\text{Cu}^{2+}$  adsorption for original and UV-aged PS-130 ( $\blacktriangle$ ), PS-260 ( $\blacksquare$ ) and PS-520 ( $\bullet$ ) in DI water and seawater.

**Table S6** Activation energy ( $E_a$ ) of  $\text{Cu}^{2+}$  adsorption and corresponding  $R^2$  values.

|             |          |                | PS-130 | PS-260 | PS-520 |
|-------------|----------|----------------|--------|--------|--------|
| Original PS | DI water | $E_a$ (kJ/mol) | 32.530 | 21.090 | 20.959 |
|             |          | $R^2$          | 0.998  | 0.996  | 0.959  |
|             | Seawater | $E_a$ (kJ/mol) | 19.950 | 13.801 | 11.368 |
|             |          | $R^2$          | 0.931  | 0.996  | 0.979  |
| UV-aged PS  | DI water | $E_a$ (kJ/mol) | 36.018 | 41.212 | 25.089 |
|             |          | $R^2$          | 0.998  | 0.997  | 0.998  |
|             | Seawater | $E_a$ (kJ/mol) | 26.917 | 21.690 | 20.631 |
|             |          | $R^2$          | 0.910  | 0.968  | 0.917  |
